# Supplementary material for: Further dissection of QTLs for salt-induced stroke and identification of candidate genes in the stroke-prone spontaneously hypertensive rat
Source: PubMed Central journal article supplement (PMC6010461; doi:10.1038/s41598-018-27539-2), 2018-06-20
Supplement: 41598_2018_27539_MOESM1_ESM.pdf [file 41598_2018_27539_MOESM1_ESM.pdf]

1 **Supplementary information**

2 Further dissection of QTLs for salt-induced stroke and identification of candidate  
3 genes in the stroke-prone spontaneously hypertensive rat.

4

5 Kaoru Niiya<sup>1</sup>, Hiroki Ohara<sup>1\*</sup>, Masato Isono<sup>3</sup>, Abdullah Md.Sheikh<sup>2</sup>, Hiroyuki

6 Matsuo<sup>1</sup>, Koichi Fujikawa<sup>1</sup>, Minoru Isomura<sup>4</sup>, Norihiro Kato<sup>3</sup>, Toru Nabika<sup>1</sup>

7 <sup>1</sup>Department of Functional Pathology and <sup>2</sup>Department of Laboratory Medicine,

8 Shimane University Faculty of Medicine, Izumo, Japan. <sup>3</sup>Department of Gene

9 Diagnostics and Therapeutics, Research Institute, National Center for Global

10 Health and Medicine, Tokyo, Japan. <sup>4</sup>Shimane University Faculty of Human

11 Sciences, Matsue, Japan.

12

13 \*To whom correspondence should be addressed to: Hiroki Ohara, Ph.D.

14 89-1 Enya-cho, Izumo, Shimane 693-8501, Japan

15 Telephone: +81-853-20-2407 FAX: +81-853-20-2135

16 E-mail: [oharah@med.shimane-u.ac.jp](mailto:oharah@med.shimane-u.ac.jp)

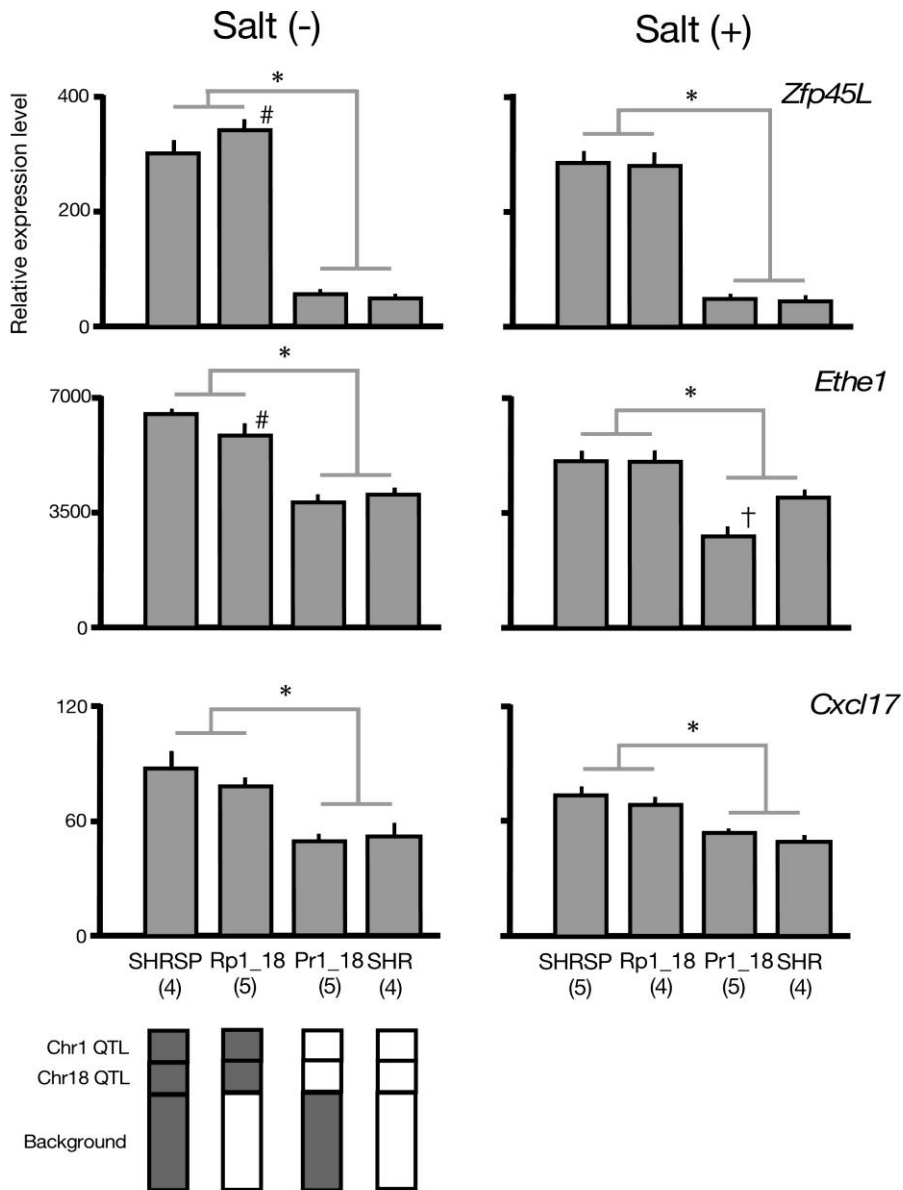

Figure S1. Gene expression of the three candidate genes by microarray analysis.

Kidneys were collected from rats with [Salt (+)] and without [Salt (-)] salt-loading (1% salt water for 1 week). Microarray analysis was performed as described in the Methods. SHRSPrch1\_18 and SHRpch1\_18 were abbreviated as Pr1\_18 and Rp1\_18, respectively. All three genes showed a significantly lower level of expression in both Pr1\_18 and SHR than in Rp1\_18 and SHRSP (\*), which was consistent with the hypothetical expression pattern (see Results). In addition, significant differences were observed between SHRSP and Rp1\_18 (#), and between SHR and Pr1\_18 (†), in *Zfp45L* and *Ethe1*. Tukey's multiple comparison test was employed for the analysis. Numbers of rats used are in parentheses. Schematic patterns of genomic composition of the four strains are shown in the bottom of the figure; grey and open boxes indicate genomes from SHRSP and SHR, respectively.

## CBL-C

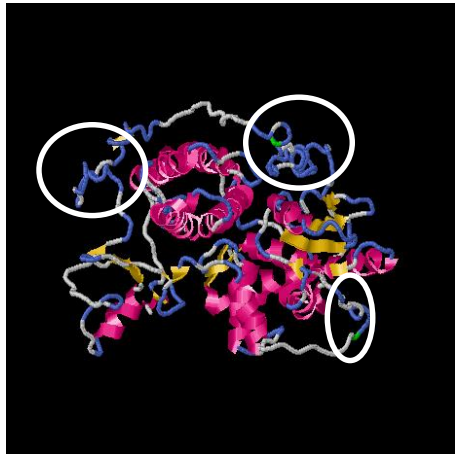

SHR

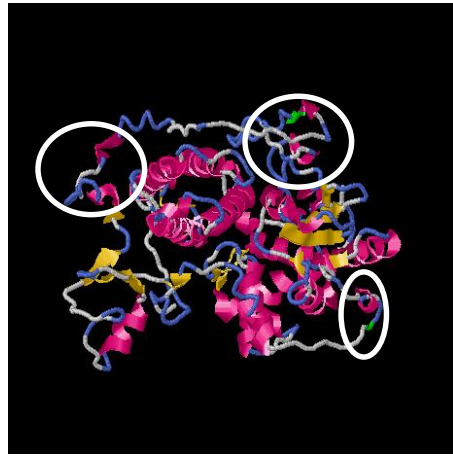

SHRSP

## CXCL17

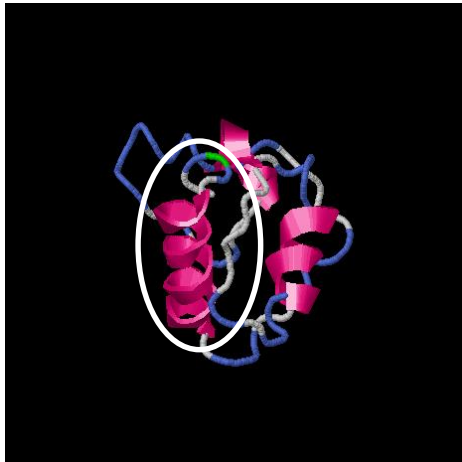

SHR

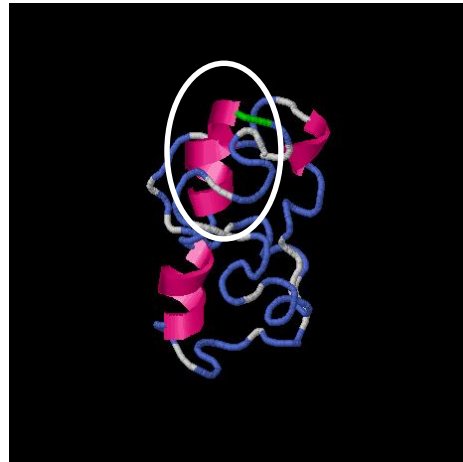

SHRSP

Figure S2. 3D-conformation of CBL-C and CXCL17 in SHR and SHRSP.

Analysis by I-TASSER implied substantial changes in the 3D-conformation of the proteins (shown with ovals). Pink;  $\alpha$ -helix, Yellow;  $\beta$ -sheet, Blue;  $\beta$ -turn, Green; amino acids of mutation positions.

Table S1. Blood pressure and body weight of subcongenic strains.

(a) subcongenic strains for the Chr-1 QTL and a double congenic strain for both the Chr-1 and -18 QTLs

|           | SP (27) | 1.6 (23) | 1.9 (22) | 1.8 (28) | 1.3 (27) | 1.4 (47) | 1.31 (20) | 1.10 (23) | 1.1 (18) | 1.1_18.0 (20) |
|-----------|---------|----------|----------|----------|----------|----------|-----------|-----------|----------|---------------|
| SBP, mmHg | 194±10  | 205±11*  | 192±12   | 194±15   | 198±10   | 193±12   | 185±11*   | 189±9     | 194±11   | 186±13*       |
| BW, g     | 265±25  | 267±14   | 254±12   | 261±15   | 267±26   | 268±18   | 277±20    | 281±26*   | 273±25   | 262±14        |

(b) subcongenic strains for the Chr-18 QTL

|           | SP (27) | 18.1 (18) | 18.2 (31) | 18.3 (40) | 18.4 (22) | 18.6 (26) | 18.7 (34) | 18.8 (27) | 18.0 (20) |
|-----------|---------|-----------|-----------|-----------|-----------|-----------|-----------|-----------|-----------|
| SBP, mmHg | 194±10  | 196±12    | 198±10    | 198±11    | 196±13    | 198±17    | 199±18    | 196±12    | 197±11    |
| BW, g     | 265±25  | 252±15    | 265±29    | 252±17    | 255±15    | 261±14    | 261±14    | 261±22    | 261±18    |

Systolic blood pressure (SBP) was measured at 12 weeks of age by the tail cuff method. \*:  $P < 0.05$  vs. SHRSP by Dunnett's

post-hoc test. Numbers of rats are in parentheses. 'SHRSPrch' is omitted from the names of subcongenic strains. SP:  
SHRSP.

Table S2. Direct sequencing in laboratory rat strains.

| Strain      | <i>Cblc</i><br>Position in CDS: 1357 (exon 9) | <i>Cblc</i><br>Position in CDS: 977 (exon 6) | <i>Cxcl17</i><br>Position in CDS: 346 (exon 4) |
|-------------|-----------------------------------------------|----------------------------------------------|------------------------------------------------|
| SHRSP/A1-sb | G                                             | A                                            | G                                              |
| SHR/Crj     | A                                             | T                                            | A                                              |
| WKY/Crj     | A                                             | T                                            | A                                              |
| Wistar      | A                                             | T                                            | A                                              |
| SR/JrNgs    | A                                             | T                                            | A                                              |
| SS/JrNgs    | A                                             | T                                            | A                                              |
| LEW/SsNSlc  | A                                             | T                                            | A                                              |
| F344/NSlc   | A                                             | T                                            | A                                              |
| DON/Kyo     | G                                             | A                                            | G                                              |

Table S3. Primers used in RT-PCR.

| Gene          | forward                      | reverse                      |
|---------------|------------------------------|------------------------------|
| <i>Ethel</i>  | 5' TGAACCCACGGCTCACTCTCAG 3' | 5' CTGGACCCACAGCGCATATTTG 3' |
| <i>Zfp45L</i> | 5' CAGGAATATGAGGCGTGTGGGA 3' | 5' CCCCGCACTCCTCACATGAATA 3' |
| <i>Cxcl17</i> | 5' GATCATGTCAAGGGCAGTGAGA 3' | 5' TATAAGGGCAGGGTGAAGCTTG 3' |

Table S4. Primers used in direct sequencing.

| Gene            | forward                       | reverse                         |
|-----------------|-------------------------------|---------------------------------|
| <i>Cblc</i>     | 5' CCTGGTTGCTCTGGCTTTC 3'     | 5' ACCCAACTCAGACCTCACTCAC 3'    |
|                 | 5' ATGTACTCATGCACACACACCA 3'  | 5' TCCAAGCCAGCACCACA 3'         |
| <i>Cxcl17</i>   | 5' ACAAAGGCCCTCCAGAAC 3'      | 5' GGACAGAAGGCATGTAAG 3'        |
| <i>Ceacam19</i> | 5' CAAAAGTCCTCCCTGAAACAACC 3' | 5' GGAGAAAGAGAGTGGATGAAAGACC 3' |
| <i>Cic</i>      | 5' GCCTGTACCTCTGGGCATTCT 3'   | 5' AGAGTGAAACGGATGCTGGTG 3'     |
